# Supplementary material for: Novel peapod-like Ni2P nanoparticles with improved electrochemical properties for hydrogen evolution and lithium storage
Source: Royal Society of Chemistry journal article supplement (doi:10.1039/c4nr05862c), 2014-11-28
Supplement: c4nr05862c1.pdf [file c4nr05862c1.pdf]

**Supporting Information:**

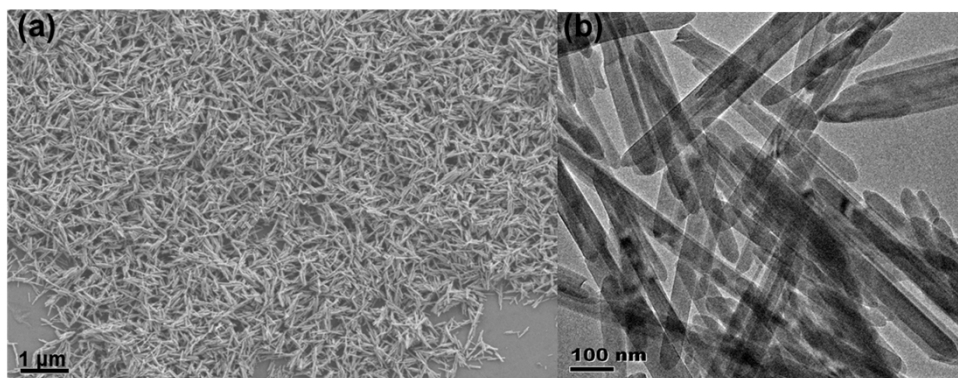

**Fig. S1** (a) is the low-magnification SEM image to show the prepared  $\text{NiNH}_4\text{PO}_4\text{H}_2\text{O}$  nanorods in a large scale and (b) is magnified TEM image to show the rod-like morphology for  $\text{NiNH}_4\text{PO}_4\text{H}_2\text{O}$  samples.

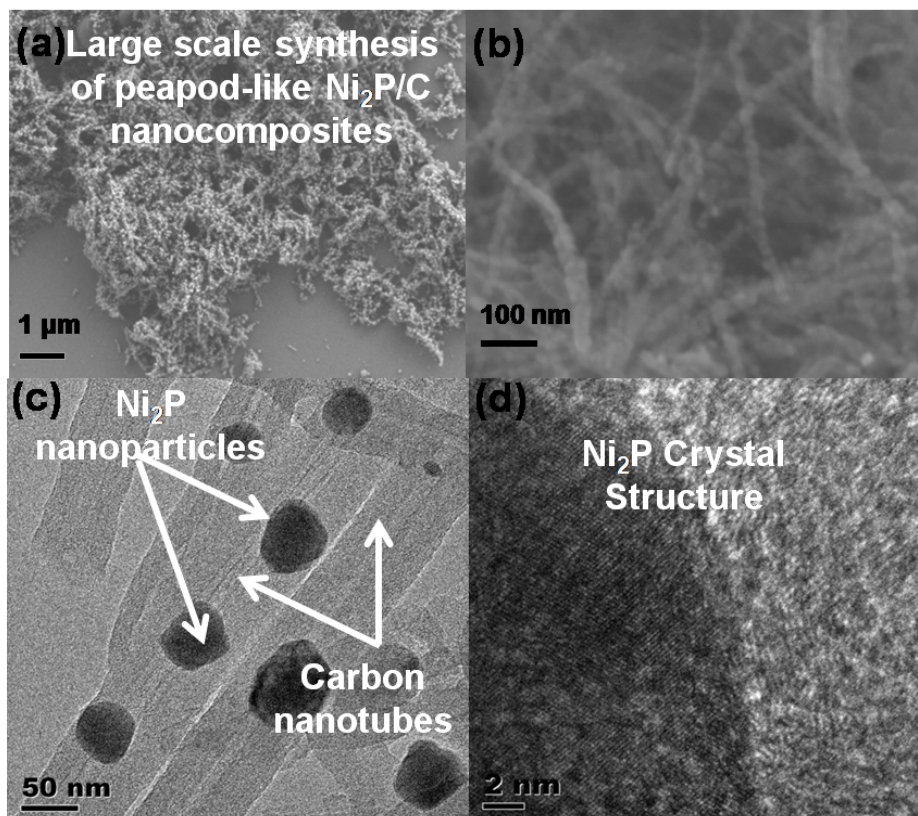

**Fig. S2** (a) and (b) are the low-magnification and high-magnification SEM images of peapod-like  $\text{Ni}_2\text{P}/\text{C}$  nanocomposites, respectively; (c) is the magnified TEM image to show the typical status of the peapod-like morphology for the  $\text{Ni}_2\text{P}/\text{C}$  nanocomposites; (d) is the HRTEM image to clearly show the crystal structure of the  $\text{Ni}_2\text{P}/\text{C}$  nanocomposites.

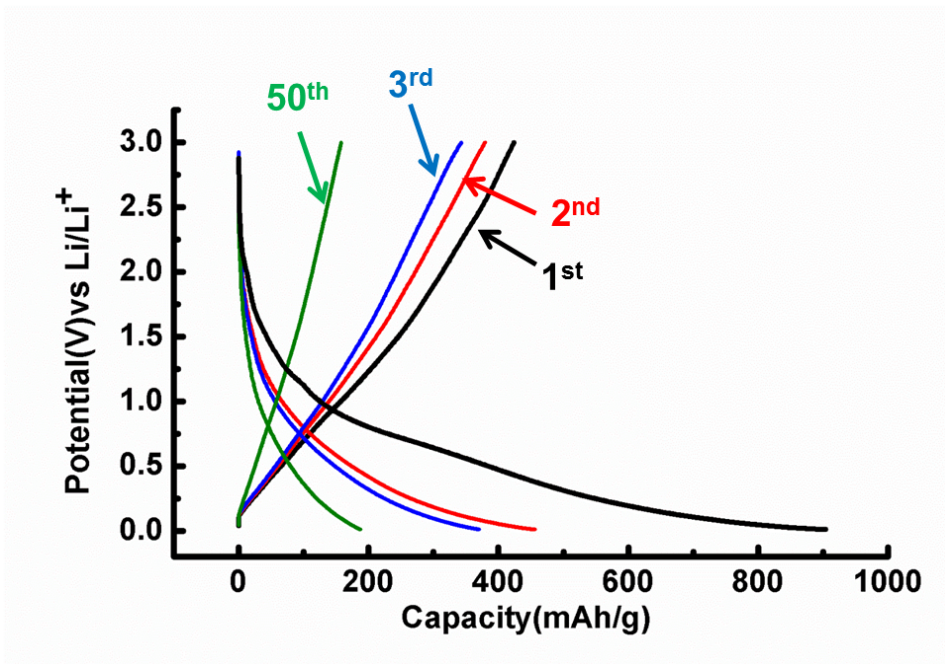

Fig. S3 Discharge-charge curves for Ni<sub>2</sub>P electrodes.

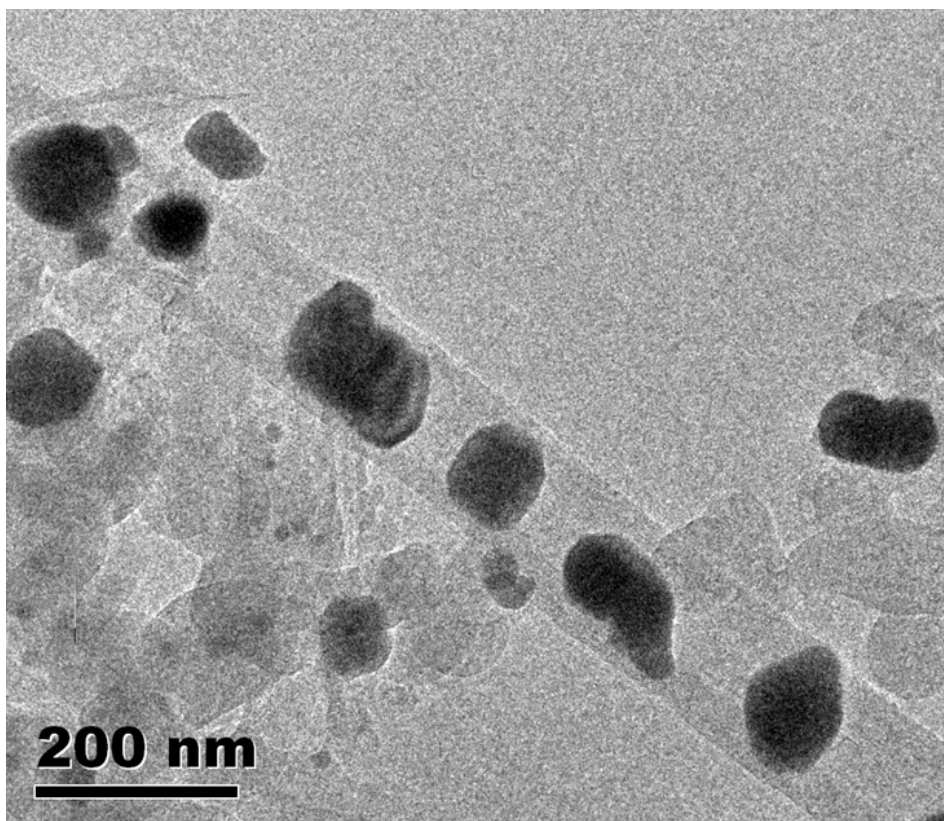

**Fig. S4** is the low-resolution TEM image to reveal that peapod-like structure is well maintained after 200 cycles' galvanostatic charge-discharge.

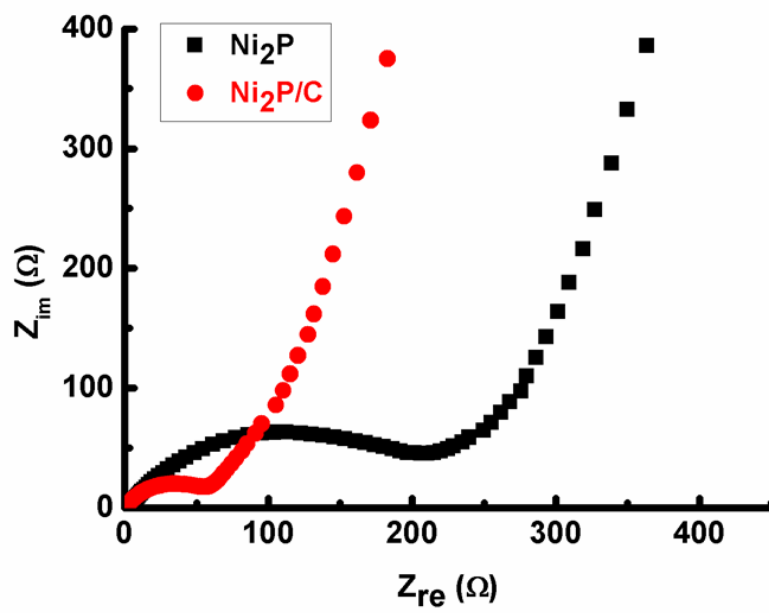

**Fig. S5** Nyquist plots of the  $Ni_2P/C$  nanocomposite and  $Ni_2P$  electrodes
